# Supplementary material for: Construction of a Genetic Linkage Map and Genetic Analysis of Domestication Related Traits in Mungbean (Vigna radiata)
Source: PLoS One. 2012 Aug 2;7(8):e41304. doi: 10.1371/journal.pone.0041304 (PMC3410902; doi:10.1371/journal.pone.0041304)
Supplement: Dataset S2 — The phenotype data for 38 domestication related traits in each BC1F1 plant or BC1F1∶2 line. (XLS) [file pone.0041304.s007.xls]

## Sheet: Sheet1
	Dataset S2. The phenotype data for 38 domestication related traits in each BC1F1 plant or BC1F1:2 line.
		BC1F1 plant ID number
	Traita	1	2	3	4	5	6	7	8	9	10	11	12	13	14	15	16	17	18	19	20	21	22	23	24	25	26	27	28	29	30	31	32	33	34	35	36	37	38	39	40	41	42	43	44	45	46	47	48
	SD100WT	3.59	6.03	6.79	4.95	4.7	4.74	5.28	4.42	6.02	5.31	4.62	5.81	5.32	6.02	6.6	4.2	6.73438	4.55	3.8	4.23	3.58	3.7907	5.51	4.47	5.36	5.38	5.13	5.05	5.83	4.25	4.91	4.98	5.35616	4.47	4.72	3.81	3.59	5.41	4.56	4.62	5.18	4.76	5.32	3.74	4.64	4.29	4.53	4.79
	SDL	4.196	4.81	5.226	4.764	4.678	4.76	4.819	4.65	4.918	4.949	4.592	5.163	4.926	4.948	5.195	4.509	5.313	4.748	4.241	4.552	4.126	3.791	4.931	4.427	5.006	4.956	4.715	4.823	5.095	4.415	4.646	4.779	4.374	4.564	4.755	4.182	4.303	4.802	4.639	4.734	4.975	4.556	4.938	4.4	4.565	4.487	4.457	4.546
	SDW	3.562	4.093	4.234	3.809	3.83	3.661	3.902	3.66	4.214	3.779	3.623	3.838	4.006	4.005	4.175	3.631	4.392	3.632	3.633	3.568	3.448	3.12	4.031	3.707	3.972	4.09	3.774	3.679	4.102	3.582	3.906	3.903	3.74	3.732	3.638	3.558	3.474	3.994	3.818	3.491	3.957	3.603	3.78	3.397	3.655	3.661	3.582	3.767
	SDT	3.56	4.046	4.281	3.742	3.74	3.923	3.878	3.654	3.982	3.763	3.646	3.924	3.934	3.954	4.276	3.717	4.388	3.701	3.688	3.639	3.396	3.125	4.098	3.726	3.897	4.192	3.868	3.785	4.165	3.577	3.826	3.896	3.77	3.825	3.773	3.511	3.542	3.912	3.916	3.609	4.049	3.753	3.79	3.486	3.679	3.612	3.714	3.749
	SDWA	6.66667	6.66667	46.6667	73.3333	40	20	73.3333	40	26.6667	73.3333	6.66667	100	80	86.6667	73.3333	20	100	46.6667	0	0	6.66667	37.5	80	0	33.3333	20	93.3333	26.6667	66.6667	6.66667	6.66667	6.66667	37.5	93.3333	60	20	0	80	0	26.6667	0	0	100	6.66667	66.6667	6.66667	26.6667	0
	SDNPPD	10.1	8.4	10.3	9.9	10.8	7.8	11.7	11.9	11.8	10	11.4	9	11.9	12.2	10	8.2	7.1	8.5	9.6	11.6	9.6	7.2	9.2	10.3	10.2	9.5	7.2	10.4	12.1	10.4	11.5	10.2	8	8.3	12.1	9.2	9	9.2	10.5	11.6	8.5	10.5	10.9	10.6	11.5	9.3	11.6	11.1
	PDD1W	14.5299	16.6667	4.34783	5.35714	30.6122	7.57576	4.44444	0	0	15.9574	7.54717	31.25	0	46.7532	0	13.6842	7.14286	12.5	20.5479	13.0435	43.3735	9.09091	0	42.1053	17.3228	25.9259	0	14.2857	0	1.75439	35.7143	5.08475	21.4286	0	18.8679	25	17.4603	3.33333	2.85714	6.34921	0	7.14286	7.14286	12.5	19.3182	26.5823	17.4603	0
	PDD2W	24.7863	36.3636	8.69565	5.35714	40.8163	7.57576	4.44444	0	0	17.0213	7.54717	35.4167	0	57.1429	0	17.8947	7.14286	12.5	21.9178	18.8406	46.988	9.09091	0	45.614	18.1102	29.6296	0	14.2857	1.5625	1.75439	35.7143	5.08475	21.4286	0	20.7547	29.3478	19.0476	4.44444	2.85714	6.34921	0	11.9048	11.4286	12.5	25	30.3797	22.2222	0
	PDD4W	81.1966	48.4848	8.69565	5.35714	51.0204	7.57576	6.66667	0	18.75	30.8511	7.54717	58.3333	1.49254	62.3377	0	76.8421	7.14286	25	76.7123	56.5217	50.6024	9.09091	0	47.3684	25.1969	51.8519	9.375	14.2857	4.6875	1.75439	67.8571	8.47458	28.5714	2.65487	26.4151	97.8261	60.3175	4.44444	2.85714	7.93651	0	14.2857	11.4286	14.5833	40.9091	94.9367	23.8095	0
	PDT	2	1.7	1.4	0.95	1.1	0.85	1.35	1.4	1.85	1.8	1.4	2.25	1.5	2.35	1.3	1.85	1.2	1.25	2.45	1.65	1.85	1.1	1.25	1.55	1.9	1.9	1	1.75	1.7	1.1	2.2	1.55	1.75	0.95	2.65	2.05	1.65	1.15	1.25	1.5	1.5	1.4	1.1	1.15	1.35	2.4	1.05	1.2
	PDL	7.15	7.02	10.08	9.1	8.61	8.81	9.54	9.91	9.15	8.79	9.5	8.4	9.99	9.44	9.24	6.43	7.54	6.84	7.03	7.43	7.32	6.63	9.04	7.82	8.86	8.1	8.14	9.49	10.46	8.77	8.14	8.61	7.28	7.41	10.53	6.41	6.22	8.92	8.66	9.03	9.57	7.72	7.76	7.49	8.08	7.62	8.37	9.76
	PDW	7.475	8.207	8.681	8.499	8.306	8.95	8.926	8.624	8.701	8.196	8.569	8.352	8.413	8.094	8.46	7.468	9.005	7.421	7.388	7.662	7.159	7.316	8.703	8.061	8.106	7.902	8.014	8.182	8.519	8.129	7.768	8.346	7.32	8.051	8.571	7.396	7.082	8.324	8.138	7.48	8.314	7.584	8.141	7.664	7.655	7.785	7.492	8.308
	PDTN	117	66	23	56	49	66	45	37	64	94	53	48	67	77	30	95	14	32	73	69	83	22	49	57	127	54	32	63	64	57	28	59	14	113	53	92	63	90	70	63	73	84	70	48	88	79	63	38
	LFPL	6.8	7	7.7	7.7	7.6	7.85	7.35	6.7	6.95	6.95	6.45	7.25	7.6	6.25	7.2	6.5	6.35	6.6	6.1	7.35	6.95	7.05	6.85	7.45	6.8	6.9	6.8	7.95	6.3	6.9	7.95	7	6.8	6.9	7.3	6.3	7.15	6.65	7.4	5.6	6.85	7.5	6.2	7	7.1	7.2	6.7	6.95
	LFPW	2.75	3.25	3.15	3.25	3	2.75	3	2.95	3.05	2.75	2.65	3.05	3.15	2.65	2.65	2.8	2.8	2.2	2.75	2.65	2.7	2.7	2.55	2.7	2.95	2.8	2.4	2.7	2.4	2.9	2.85	3.05	2.95	2.6	2.85	2.65	2.7	2.85	3.25	3.1	2.85	3.25	2.8	2.7	2.75	2.9	2.7	3
	LFML	14.7	10.7	14.3	14.5	11.3	11.8	13.7	12.5	16.3	17.2	14	12.5	14.6	15.7	11.5	12.9	10.6	12.6	12.7	15.2	15.2	13	13.2	15.4	17.3	13.7	15	12.9	14	12.7	13.5	12.1	11.9	16	15.8	11.4	12.5	16.5	18.2	14.9	14.8	14	11.4	12.9	12.7	13	14.3	12.7
	LFMW	11.6	10.2	11.8	12.7	10.3	11.2	12.5	10.5	15.8	14.9	12	11.8	13.1	12.9	8.9	11.2	9.4	9.6	10.9	12.1	13.1	12.2	11.6	12.1	14.9	11.1	11.7	10.8	11.9	11.3	11	10.7	10.1	14.3	14	10.9	12.2	14.7	15.5	13.8	12.2	12.4	10.5	10.8	12.3	11.5	10.7	10.5
	STT	8.54	6.84	6.33	8.28	7.75	7.81	7.7	8.24	8.23	9.11	7.52	6.75	9.57	7.62	6.97	6.47	7.06	7.64	7.9	7.49	8.99	7.85	7.57	7.71	8.96	7.34	6.61	7.66	6.98	7.42	6.93	7.67	6.6	8.77	7.9	6.95	8.07	8.45	8.95	9.36	8.76	7.41	7.95	7.76	7.81	7.42	7.66	6.69
	HCL	4.8	5.4	5.2	4.9	4.7	4.7	5.9	3.1	5.7	5.8	3.1	7.4	6.3	4.3	6	4.8	5.3	4.5	2.8	5.8	4.5	4.2	5.9	4.7	5.2	6.8	4.9	6.3	5.8	4.8	5.6	5.6	6.3	6	3.6	2.8	3.8	4.7	4.8	5.7	5.3	4.6	2.9	5.6	4.2	4.6	5	3.5
	ST1I	0.9	1.1	1.3	1.1	1.1	1.3	1.3	0.6	1.2	1.1	0.7	0.8	1.2	1	0.8	1	1.1	1	0.8	1.1	1	1.1	1.2	1.1	0.6	1	1	1.1	0.8	0.6	1.1	0.7	0.9	0.9	1.1	0.8	1.1	1.2	0.7	0.8	0.8	1	0.7	1.2	1.4	0.6	1.4	0.7
	ST2I	1	1.4	1	1.5	1.7	1.6	1.8	1.1	1	1.2	0.9	1	1.8	1.3	1.1	1.1	1.4	1.2	0.8	1.5	1.2	1	0.8	1.2	0.9	1	1.5	1.6	1.1	0.7	1.2	0.8	1.1	1.5	1.2	1.1	1.2	1.3	1.1	0.9	1	1.9	1	1.2	1.5	0.7	2	1.4
	ST3I	1.4	2.1	2.6	2.4	3	1.9	2.6	1.2	1.5	1.6	1.4	1.7	2.2	2.8	2	1.6	2.8	1.3	1.2	1.7	1.5	1.5	1.8	1.4	1.3	1.3	2.1	2.5	2.3	1.6	1.5	1.1	1.9	1.8	2.4	1.6	1.3	1.9	1.5	1.6	1.7	2.4	1.5	1.8	2.4	1.5	3.1	1.9
	ST4I	2.8	2.4	2.7	3.2	4.2	2.7	4.8	3	2.7	2.7	3	2.6	4	3.3	4.4	2.8	3.6	2.5	2.6	2.5	2.5	2.5	2.5	3	2.6	2.8	3.2	3.1	4.4	3.1	2.4	2.7	3.1	2.8	3.2	2.5	2.3	3	2.2	3.4	3.1	4.3	2.5	3.3	2.9	2.7	4	2.7
	ST5I	4.2	5.3	4.4	5.8	6.3	3.9	6.8	4.7	4.2	4.3	4.6	4.3	7.2	6.4	5.5	3.9	5	3.7	4	3.9	3.2	3.4	5	2.9	2.9	3.6	5	5.2	7.2	4.8	3.4	3.6	4	4.1	6.3	3.4	2.5	5.3	5	5.1	5.2	6.3	4.2	5.8	4.7	3.5	4.7	3.3
	ST6I	5.9	7.5	5.4	7.7	7.6	4.8	7.7	4.7	5	5.8	6.6	6.6	9.6	6.6	6.3	5.5	6.7	4.2	5.8	5.8	4.2	4.4	8.8	4	5.2	4.7	7.8	8.3	9	6.3	6.3	4.7	5.1	7.3	8.5	4.4	3.4	8.1	9.6	7	7.3	7.4	6.6	6.2	6.3	4	4.8	3.9
	ST7I	7.4	7.6	6	9.5	9.2	5.2	9.8	5.8	6.9	7.8	8.2	11.8	11	8.4	6.6	7.2	8	5.5	7	8.4	5.3	6.2	9	4.9	7.4	8	9.4	10	9.8	8.1	8.2	5.5	6.6	10.5	9.5	5.6	7.2	10.4	10.2	9.7	11.2	8.7	7	6.5	6.3	4.2	6.7	3.9
	ST8I	8.5	9.2	12.1	11.6	26.5	6.3	12.9	7.2	7.2	9.7	12.6	11.8	15.7	14.8	10.6	8.8	12.8	6.6	7	8.4	5.6	9.5	9.3	7.2	7.5	9.2	12.5	10.6	10.5	9.4	8	6.6	7.6	10.2	13	7.1	10.2	12.1	11.6	8.5	11.7	11	7	7.6	7.9	5.4	9.2	5.7
	ST9I	10.8	17.6	19.8	21.8	28.5	8.7	16.6	10.3	9.9	10.4	18.1	19.1	15.9	28.4	13.8	23	17.7	8.6	11.1	11.4	10.2	18.3	13.5	9.7	10	17.1	21	10.6	12.2	11.3	13.1	11.9	11.2	14.3	15.2	12.8	12.7	13.1	22.3	12.7	15.2	13.2	7.2	15.7	13.2	9.7	10.6	8
	ST10I	14.6	25.8	18.6	37.4	43.7	18.7	17.2	22.8	13.8	11.2	26.4	36.3	16.4	32.2	22.8	44.6	22.3	13.2	22.6	23	21.6	37.3	17.4	18.5	12.1	30.4	16.8	14.8	15.7	21.7	19.2	24.4	12.8	15.5	20.8	25.5	23.2	14.4	32.5	17.2	22.8	13.6	9.8	27.6	19.8	21.5	10.9	17.4
	STL	62.3	85.4	79.1	106.9	136.5	59.8	87.4	64.5	59.1	61.6	85.6	103.4	91.3	109.5	79.9	104.3	86.7	52.3	65.7	73.5	60.8	89.4	75.2	58.6	55.7	85.9	85.2	74.1	78.8	72.4	70	67.6	60.6	74.9	84.8	67.6	68.9	75.5	101.5	72.6	85.3	74.4	50.4	82.5	70.6	58.4	62.4	52.4
	BRN	10	7	0	3	4	7	5	7	9	7	8	3	11	9	7	8	2	3	8	9	12	6	8	6	5	3	1	5	9	9	3	5	0	8	4	7	9	12	9	11	10	9	8	5	10	6	7	6
	BRP	2	6	-	3	3	7	2	2	2	1	2	4	2	2	2	3	8	1	2	2	1	4	3	2	1	5	6	1	2	2	3	2	-	2	2	3	2	1	2	2	2	5	5	3	3	3	3	3
	FLD	55	63	43	42	45	51	66	62	59	55	61	35	71	46	58	39	55	41	55	52	53	44	66	48	49	37	43	49	57	74	41	66	49	68	49	55	49	64	64	68	66	72	71	56	56	50	60	64
	PDDM	22	39	19	21	19	22	32	45	39	28	42	21	33	34	46	19	34	15	39	38	29	20	39	32	20	26	19	20	40	39	16	34	23	39	20	32	35	29	45	37	44	34	31	36	41	19	32	40
	SDCBMb	W	W	C	W	C	W	W	W	C	W	W	C	W	W	C	W	C	W	W	W	W	W	W	C	W	C	W	W	C	W	W	C	W	W	W	C	W	W	W	C	C	W	C	W	C	C	W	C
	SDC	W	W	C	C	C	C	C	W	W	W	C	W	W	C	W	W	C	W	W	W	C	W	C	C	W	C	C	W	W	W	W	W	C	W	C	W	C	W	C	C	C	C	C	W	W	W	C	C
	SDHC	W	W	C	C	C	C	C	W	W	W	C	W	W	C	W	W	C	W	W	W	C	W	C	C	W	C	C	W	W	W	W	W	C	W	C	W	C	W	C	C	C	C	C	W	W	W	C	C
	STDET	C	W	C	W	W	W	C	W	C	C	W	W	C	W	W	W	W	C	W	W	W	W	W	W	C	W	C	C	W	W	C	W	C	C	C	W	W	C	W	C	W	C	C	W	W	W	C	W
	a Trait abbreviations are shown in Table 1.
	b For four qualitative traits (SDCBM, SDC, SDHC and STDET), the letters “C” and ”W” indicate the cultivated parent type and wild parent type, respectively.
[truncated: 202 more columns]
